# Supplementary material for: Selective, high efficiency reduction of CO2 in a non-diaphragm-based electrochemical system at low applied voltage
Source: Royal Society of Chemistry journal article supplement (doi:10.1039/c4ra14427a), 2014-12-22
Supplement: c4ra14427a1.pdf [file c4ra14427a1.pdf]

## Supporting Information

### Selective, High Efficiency Reduction of CO<sub>2</sub> in a Non-Diaphragm-Based Electrochemical System at Low Applied Voltage

Kwang-Jin Yim<sup>1†</sup>, Dong-Keun Song<sup>2†</sup>, Chan-Soo Kim<sup>3†</sup>, Nam-Gyu Kim<sup>1</sup>, Toru Iwaki<sup>4</sup>, Takashi Ogi<sup>4</sup>, Kikuo Okuyama<sup>4</sup>, Sung-Eun Lee<sup>5\*b</sup>, Tae-Oh Kim<sup>1\*a</sup>

#### *Table of contents*

1. Analysis of water content by Karl Fischer coulometry.
2. GC-MSD analysis results
3. Analysis of CH<sub>4</sub>/H<sub>2</sub> according to reaction time
4. Methanol production according to reaction time

1. Water content analysis by Karl Fischer coulometry

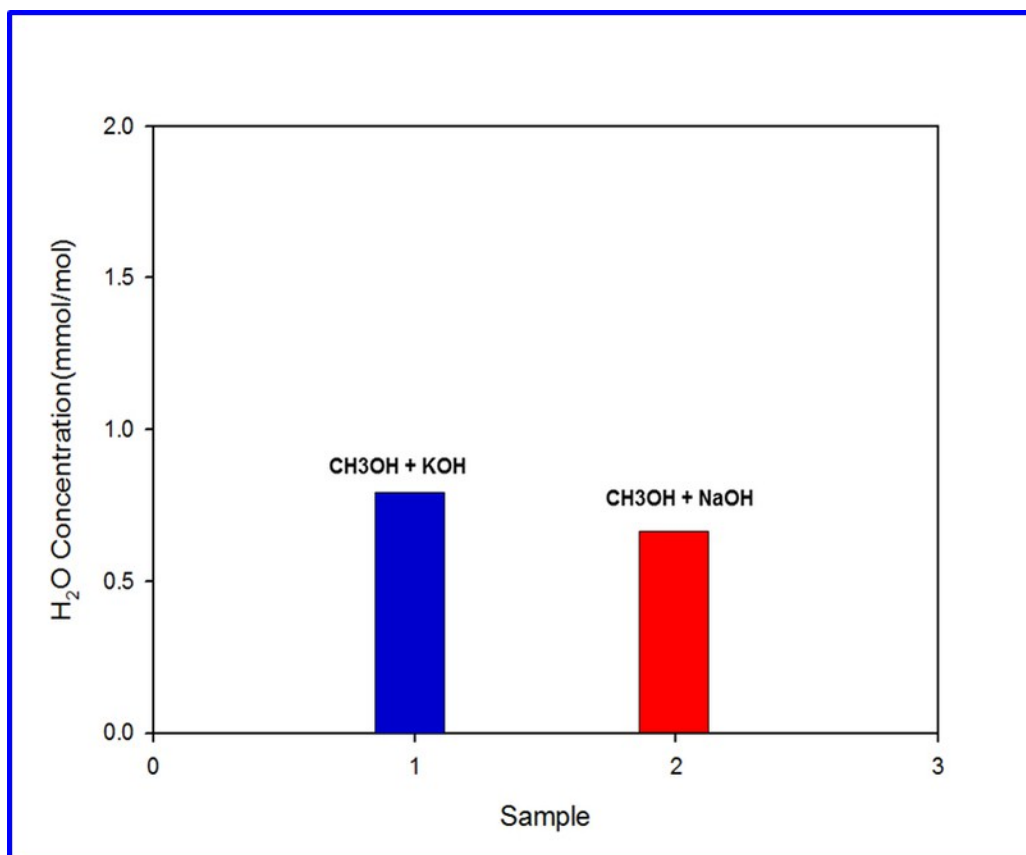

Figure S1. Concentrations of water generated from the dissolved 0.2 M KOH or 0.2 M NaOH with methanol (115 mL) at 25°C.

Figure S1 is the result of the analysis of water concentrations after the dissolution reaction of 0.2 M KOH or 0.2 M NaOH with methanol using a Karl Fischer Coulometer. Dissolution of KOH with CH<sub>3</sub>OH produced a higher water concentration in comparison to that of CH<sub>3</sub>OH and with CH<sub>3</sub>OH.

## 2. GC-MSD analysis results

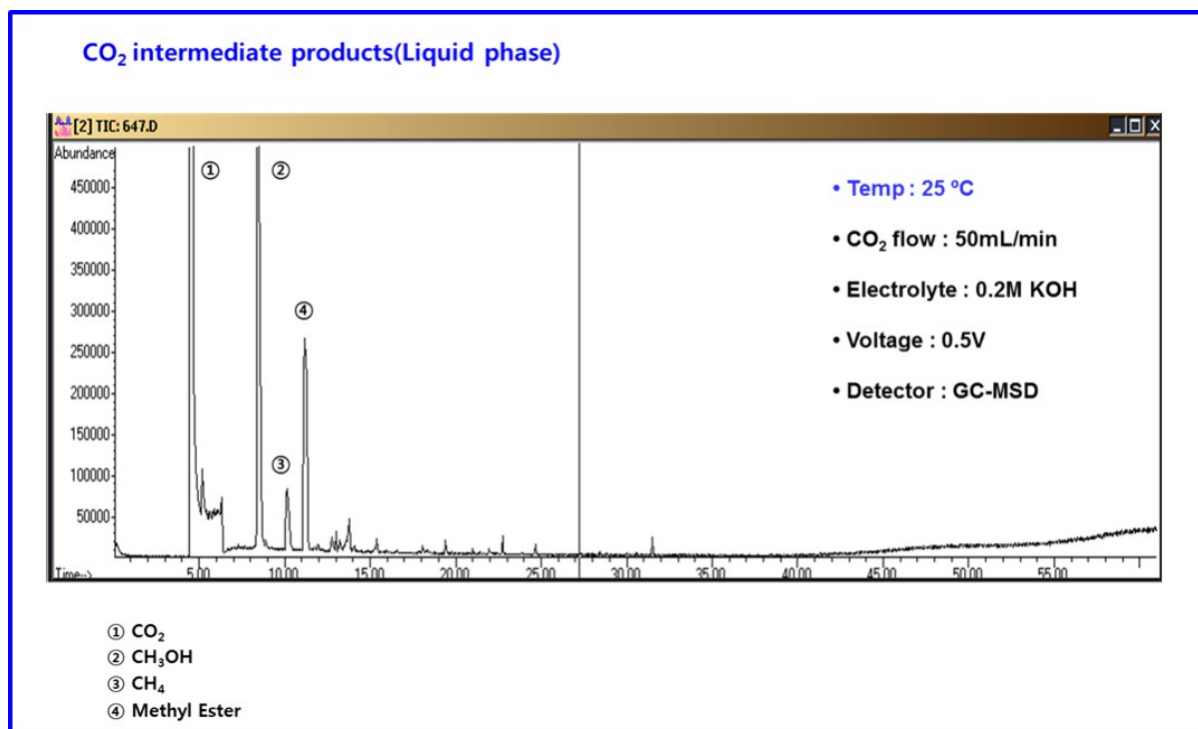

Figure S2. GC-MSD chromatogram for reduction in 0.2 M KOH at a CO<sub>2</sub> flow rate of 50 mL·min<sup>-1</sup> and applied voltage of 0.5 V at 25°C.

Figure S2 is presents a product analysis using GC-MSD. Other than the final product, CH<sub>4</sub>, only methyl ester was determined. The non-diaphragm electrochemical system produces only H<sub>2</sub> and CH<sub>4</sub>. The same products were determined for reaction times of 1 to 5 h.

### 3. Analysis of CH<sub>4</sub>/H<sub>2</sub> according to reaction time

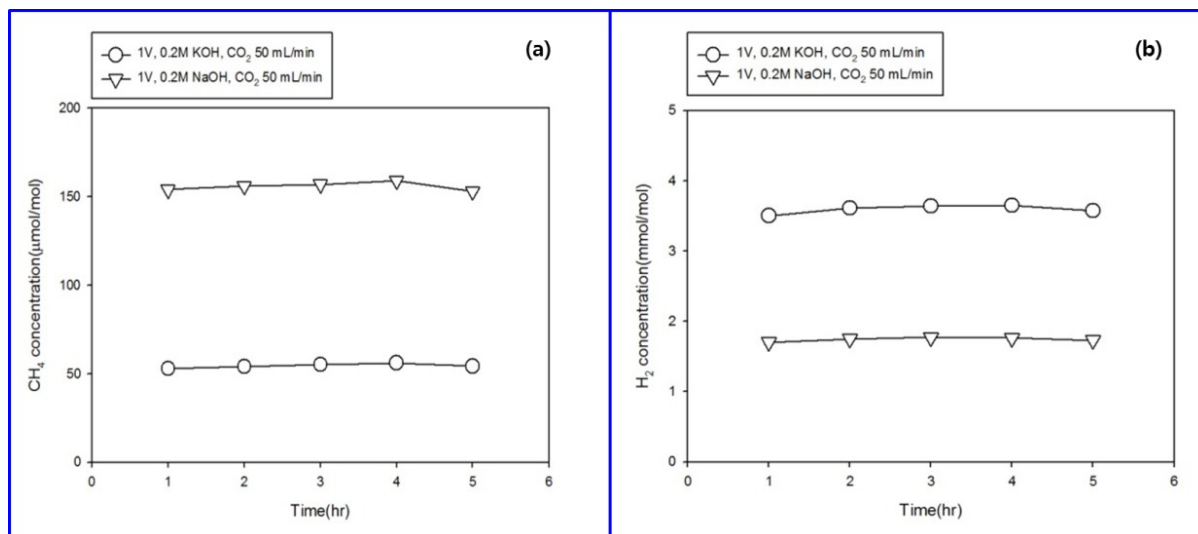

Figure S3. Comparison of CH<sub>4</sub>/H<sub>2</sub> production over time in a non-diaphragm-based electrochemical system at a CO<sub>2</sub> flow rate of 50 mL·min<sup>-1</sup> and applied voltage of 0.5 V at 25°C with different electrolytes. (a), CH<sub>4</sub> concentration (GC-FID); and (b), H<sub>2</sub> concentration (GC-TCD).

Figure S3 presents the analysis of concentrations of CH<sub>4</sub>/H<sub>2</sub> according to the reaction time. The pattern is nearly as constant as a steady state, and the products differ according to additional electrolytes (NaOH and KOH). As shown in Figure S3, CH<sub>4</sub> is the main product when NaOH is used as an electrolyte, while H<sub>2</sub> is the main product when KOH is used as an electrolyte. The results indicate that using NaOH and KOH may select the type of product. Only CH<sub>4</sub> and H<sub>2</sub> are the products throughout the CO<sub>2</sub> reduction reaction, as shown in Fig S2, and we thus confirm the advantage of a non-diaphragm-based electrochemical system.

4. Methanol production according to reaction time

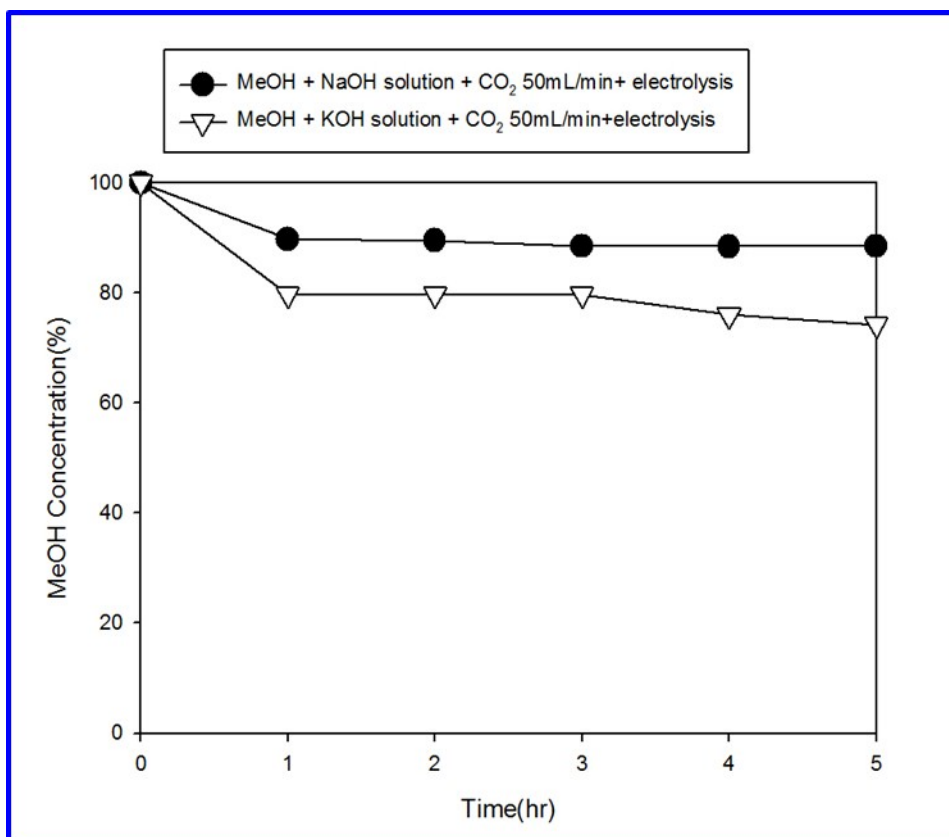

Figure S4. Comparison of methanol concentration produced in non-diaphragm-based electrochemical system at a CO<sub>2</sub> flow of 50 mL·min<sup>-1</sup> and applied voltage of 0.5 V at 25°C with different electrolytes: 0.2 M KOH (inverted triangles) and 0.2 M NaOH (closed circles).

Figure S4 documents the CH<sub>3</sub>OH concentrations over time after the application of voltage. At 1 h, the CH<sub>3</sub>OH concentration decreases due to dissolution reaction with NaOH and KOH. However, CH<sub>3</sub>OH is not degraded electrochemically because the concentration is constant with the extended reaction time.
